# Supplementary material for: Comparison of fibrin sealants in peripheral vascular surgery: A systematic review and network meta-analysis
Source: PubMed Central journal article supplement — Ann Med Surg (Lond). 2020 Dec 9;61:161–8. doi: 10.1016/j.amsu.2020.12.003 (PMC7782199; doi:10.1016/j.amsu.2020.12.003), 2020-12-09
Supplement: mmc5.pdf [file mmc5.pdf]

|                         |                         |                        |                        |                        |                               |
|-------------------------|-------------------------|------------------------|------------------------|------------------------|-------------------------------|
| <b>VISTASEAL 2C</b>     |                         |                        |                        |                        |                               |
| 1.03<br>(0.77 to 1.42)  | <b>EVICEL 1C</b>        |                        |                        |                        |                               |
| 1.33<br>(0.92 to 2.17)  | 1.29<br>(0.86 to 2.11)  | <b>VISTASEAL 1C</b>    |                        |                        |                               |
| 1.35<br>(0.94 to 2)     | 1.31<br>(0.89 to 1.94)  | 1.01<br>(0.59 to 1.63) | <b>TISSEEL 2C</b>      |                        |                               |
| 1.88*<br>(1.08 to 4.47) | 1.82*<br>(1.02 to 4.29) | 1.41<br>(0.7 to 3.48)  | 1.39<br>(0.83 to 3.11) | <b>TISSEEL 1C</b>      |                               |
| 2.66*<br>(1.97 to 3.38) | 2.58*<br>(1.87 to 3.29) | 2.00*<br>(1.22 to 2.8) | 1.97*<br>(1.31 to 2.7) | 1.40<br>(0.58 to 2.47) | <b>Manual<br/>Compression</b> |
